# Supplementary material for: Uncertainty analysis of a machine learning-aided ensemble forecast for coastal flood maps
Source: Research Square preprint supplement (doi:10.21203/rs.3.rs-8758359/v1), 2026-02-11
Supplement: Supplementary file 1 [file 8562ff0a9569ff8a63950408.docx]

**Supplementary Materials**

**Uncertainty analysis of a machine learning-aided ensemble forecast for coastal flood maps**

Jeremy Rohmer1, S. Lecacheux1, D. Idier1, E. Membrado2, A. G. Filippini1, R. Pedreros1, D. Paradis2, A. Dalphinet2

[1]{BRGM, 3 av. C. Guillemin - 45060 Orléans Cedex 2 - France}

[2] {Météo-France, DIROP/MAR, Toulouse}

Correspondence to: J. Rohmer (j.rohmer@brgm.fr)

## **Numerical simulation of the floods induced by Ciaran and Domingos pseudo-storms**


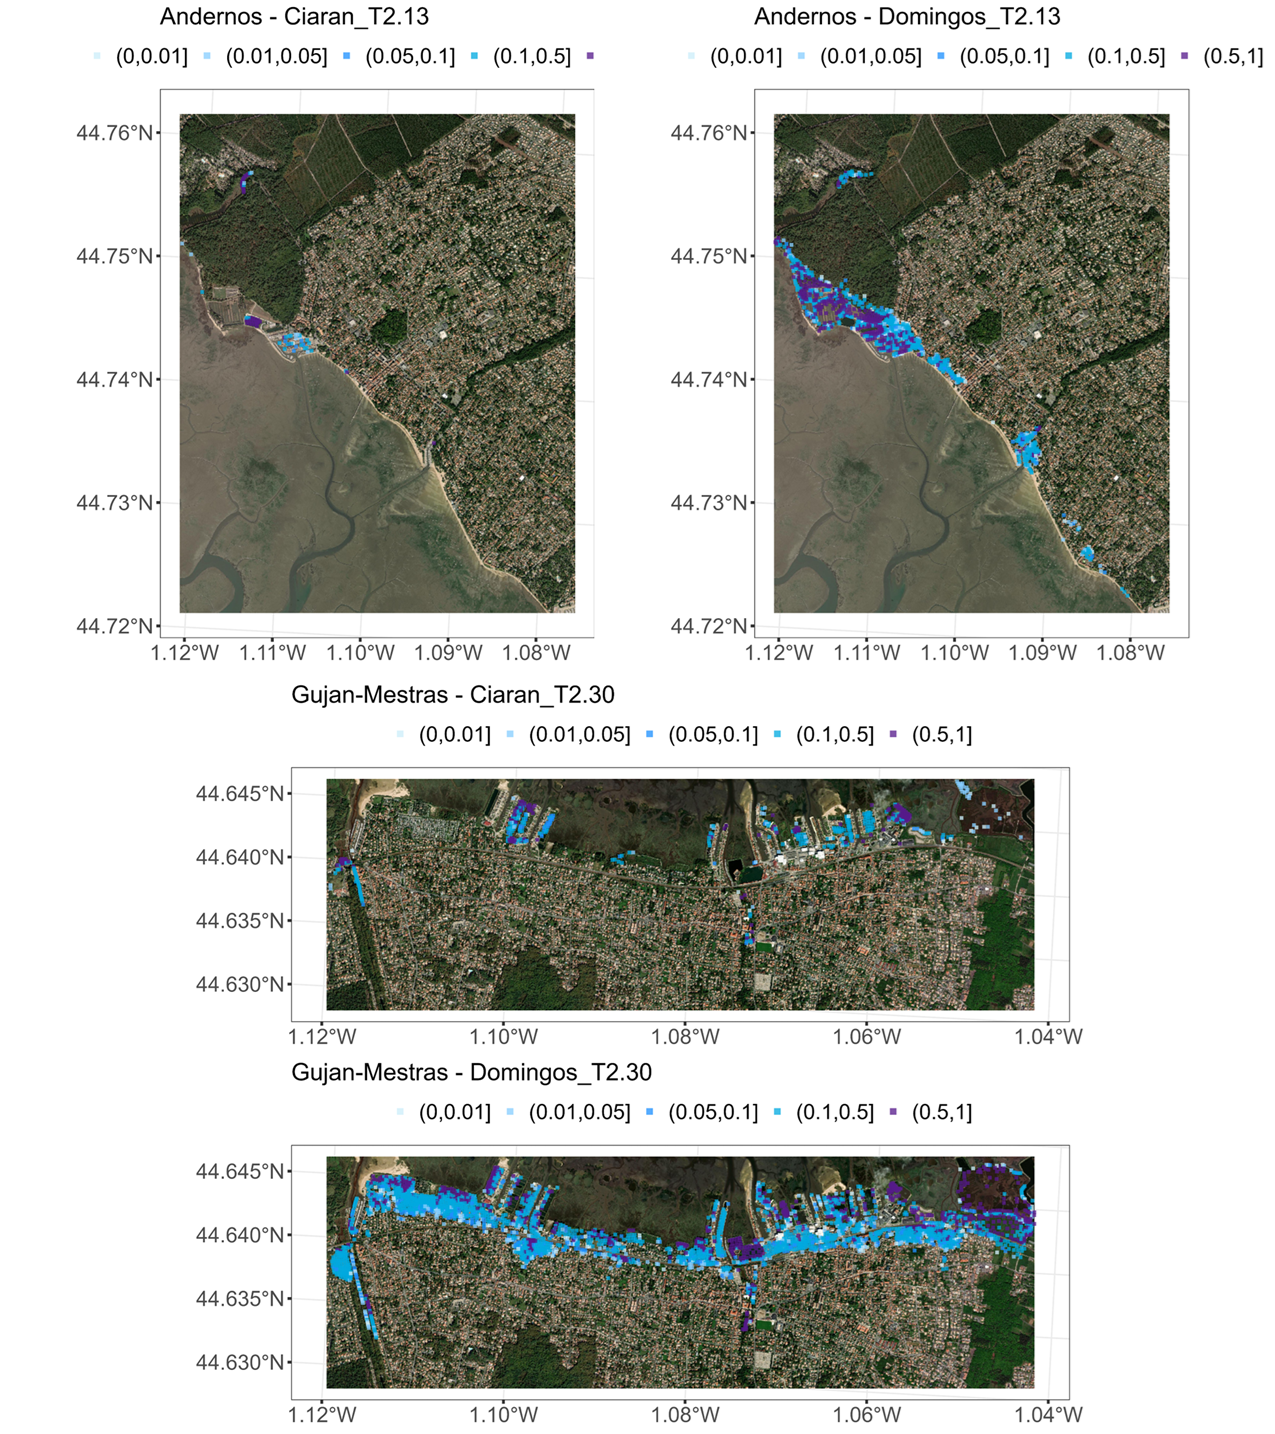


Figure S1. Flood maps numerically simulated at Andernos (top) and at Gujan-Mestras (bottom) for the pseudo-historical storms Ciaran and Domingos considering the meteocecanic conditions described in Table 1 and the high tide level *T*=2.13 and 2.30 m (indicated in the title of each panel).


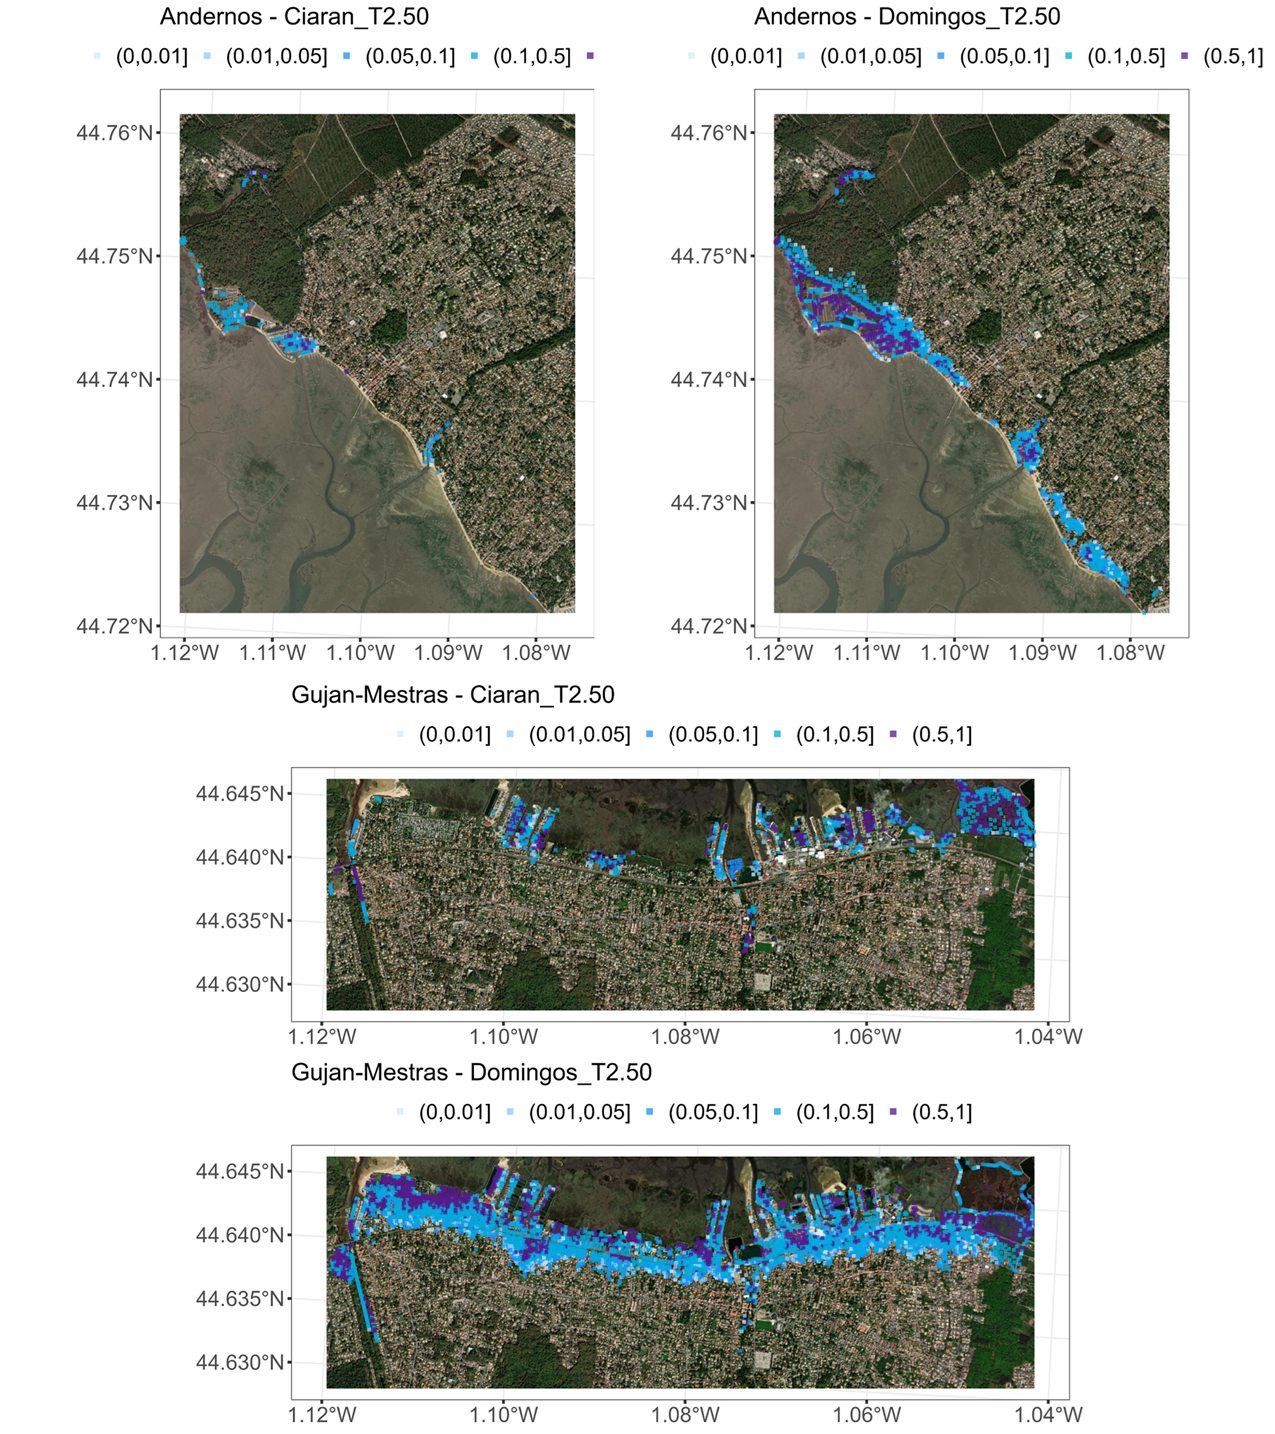


Figure S2. Flood maps numerically simulated at Andernos (top) and at Gujan-Mestras (bottom) for the pseudo-historical storms Ciaran and Domingos considering the meteocecanic conditions described in Table 1 and the high tide level *T*=2.50 m (indicated in the title of each panel).

## **Robustness to the GSA assumptions**

We analyse the robustness of our GSA results to the parametrisation of the kernel for handling spatial outputs (as described in Sect. 4.3). To do so, we conducted the HSIC-based GSA by varying the total amount of variance explained by the PCA, i.e., 90 or 95%, and by changing the weighting procedure, i.e., weights applied on the one-dimensional Gaussian kernels (‘*extern*’ approach, as described in Eq. 10), or weights applied on the principal components (‘*intern*’ approach). Figure S3, left shows how these different assumptions lead to minor changes in the HSIC-ANOVA sensitivity indices when considering the 2-day ahead forecast at Andernos for the pseudo-historical storm Ciaran with *T*=2.50 m.


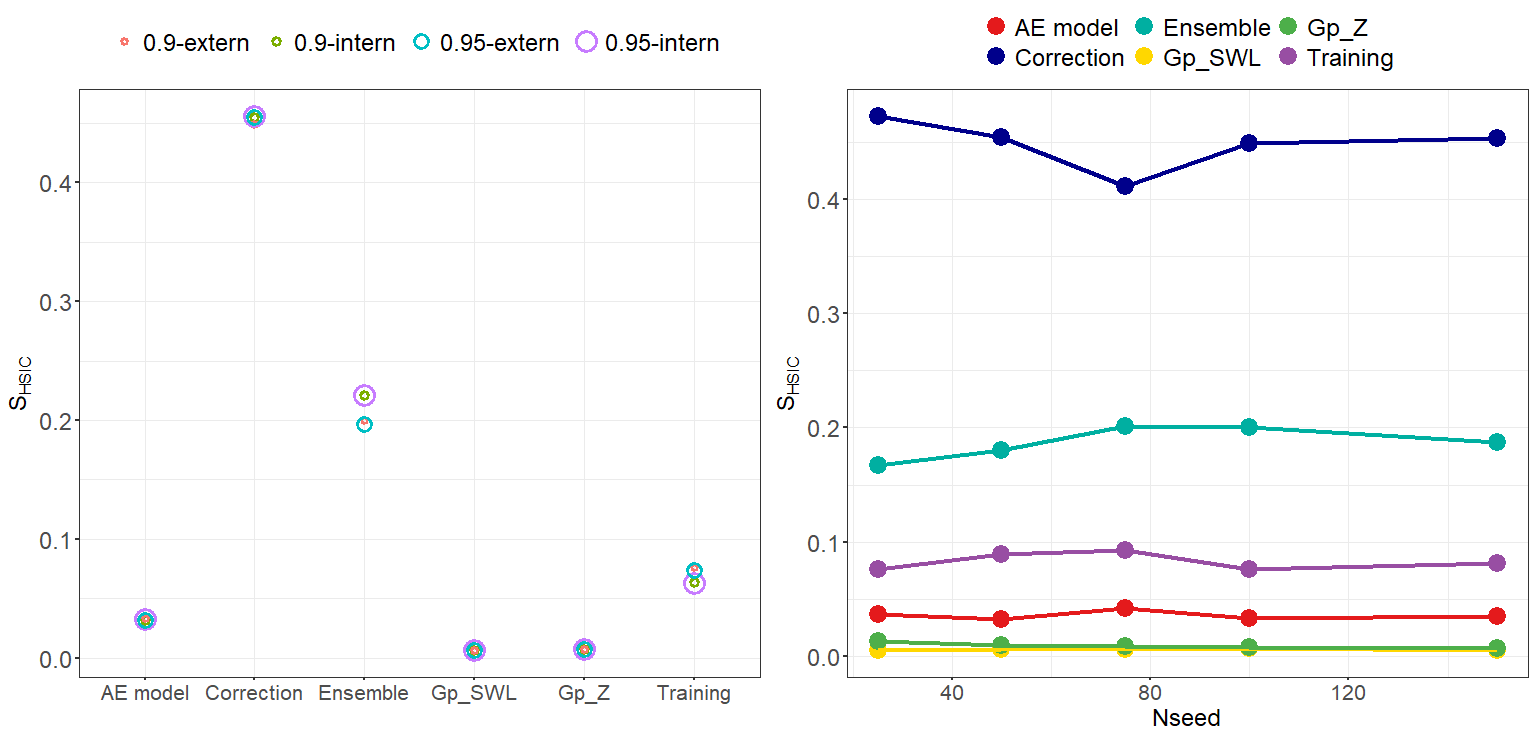


Figure S3. Analysis of the robustness of the GSA results to the parametrisation of the kernel for spatial outputs (left) and to the number of stochastic Gp simulation *N*seed (right) considering the forecast at lead time of 2 days of the flood map at Andernos for Ciaran pseudo-historical storm with peak tide level at *T*=2.50m.

The influence of a second assumption was investigated, namely the number of stochastic simulations *N*seed used to capture the Gp metamodel error (as described in Sect. 4.2). For the same forecast situation described above, we conducted HSIC-based GSA by varying *N*seed from 25 to 150. The inspection of the convergence of the indices in Fig. S3, right confirms here the validity of our assumption of using *N*seed=100. This robustness was also checked for two other scenarios of high tide level *T*=2.13 and *T*=2.82 m (Fig. S4).


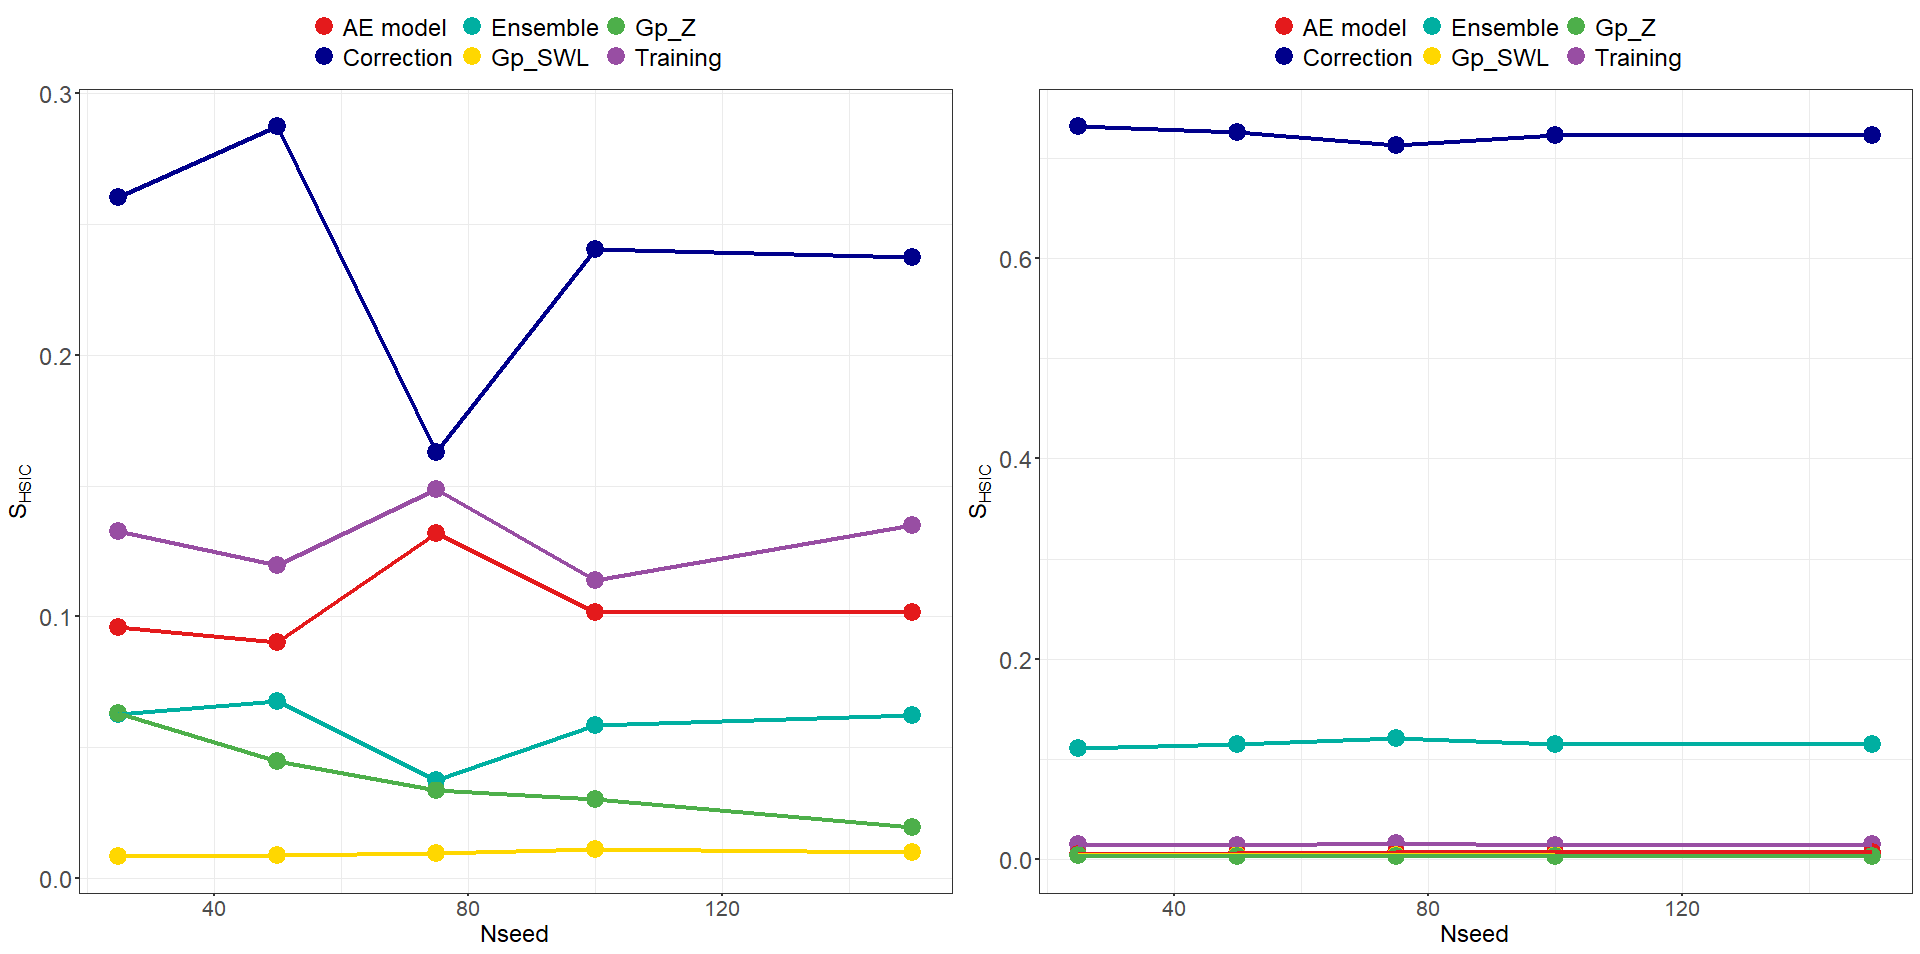


Figure S4. Analysis of the robustness of the GSA results to the number of stochastic Gp simulation *N*seed considering the forecast at lead time of 2 days of the flood map at Andernos for Ciaran pseudo-historical storm with peak tide level at *T*=2.13m (left) and *T*=2.82m (right).
